# Supplementary material for: Chemical combinations potentiate human pluripotent stem cell-derived 3D pancreatic progenitor clusters toward functional β cells
Source: PubMed Central journal article supplement (PMC8184986; doi:10.1038/s41467-021-23525-x), 2021-06-07
Supplement: 41467_2021_23525_MOESM1_ESM.pdf [file 41467_2021_23525_MOESM1_ESM.pdf]

**Chemical combinations potentiate human pluripotent stem cell-derived 3D pancreatic progenitor clusters toward functional  $\beta$  cells**

Haisong Liu et al.

**File name: Supplementary Information**

Description: Supplementary Figures, Supplementary Tables and Supplementary Methods.

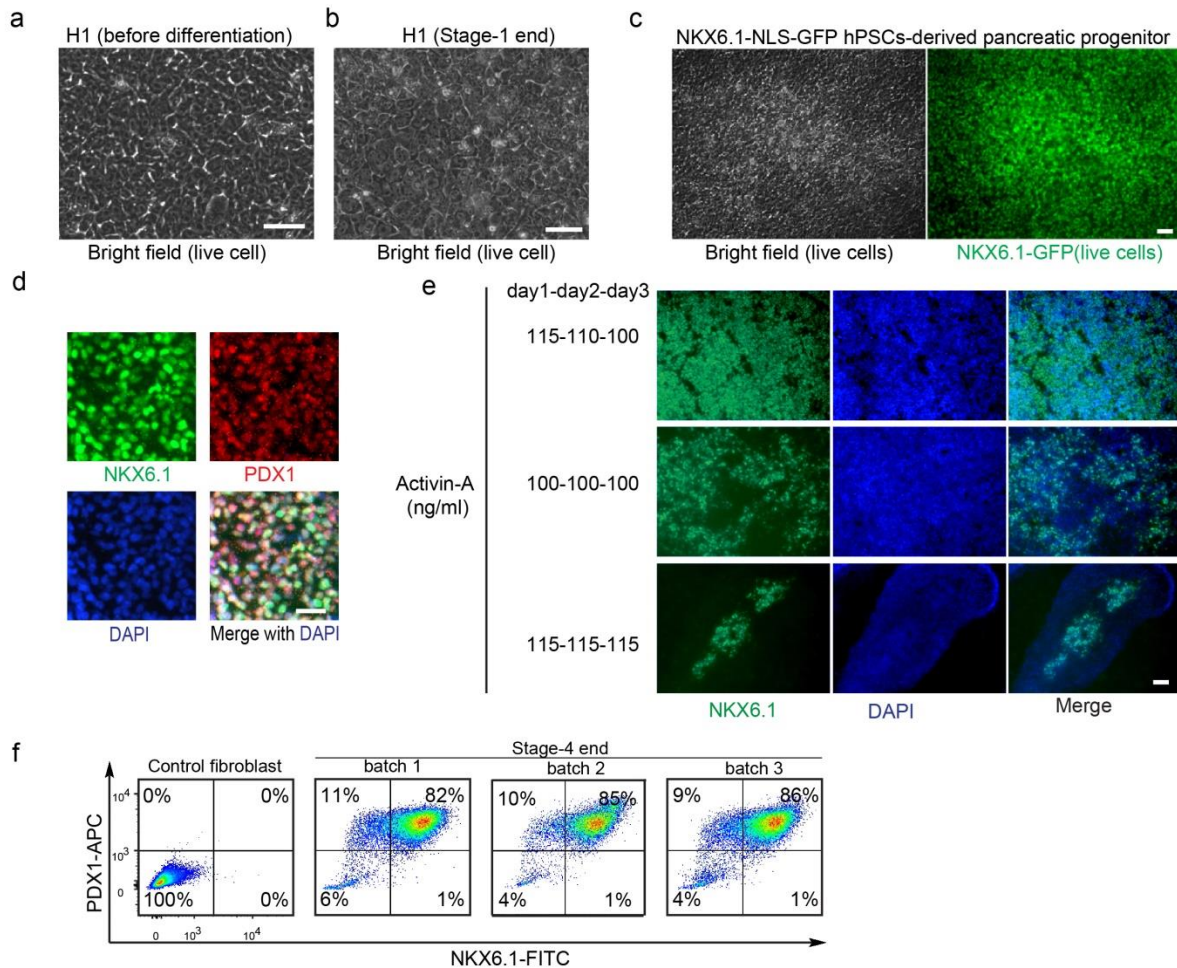

**Supplementary Fig. 1. Additional data on the efficiently generating pancreatic progenitor (PP) 3D-clusters, Related to Fig. 1.** (a) Morphology of hPSCs right before differentiation. (b) Morphology of hPSCs-derived definitive endoderm cells (at the end of stage 1). (c) Fluorescent image of live pancreatic progenitors generated from NKX6.1-NLS-GFP hPSCs at the end of stage 4. (d) Immunostaining of PDX1 and NKX6.1 of the stage-4 culture cells (e) Immunostaining of NKX6.1 of the stage-4 culture cells after different Activin-A treatment strategies at stage 1. (f) Flow cytometry analysis of stage-4 culture cells from three different batches (n=3). Nuclear DAPI staining is shown in blue. Scale bar, 50  $\mu$ M for a, b and d; 100  $\mu$ m for the others. Images of a-e are representative of 3 independent experiments, respectively. Source data are provided as a source data file.

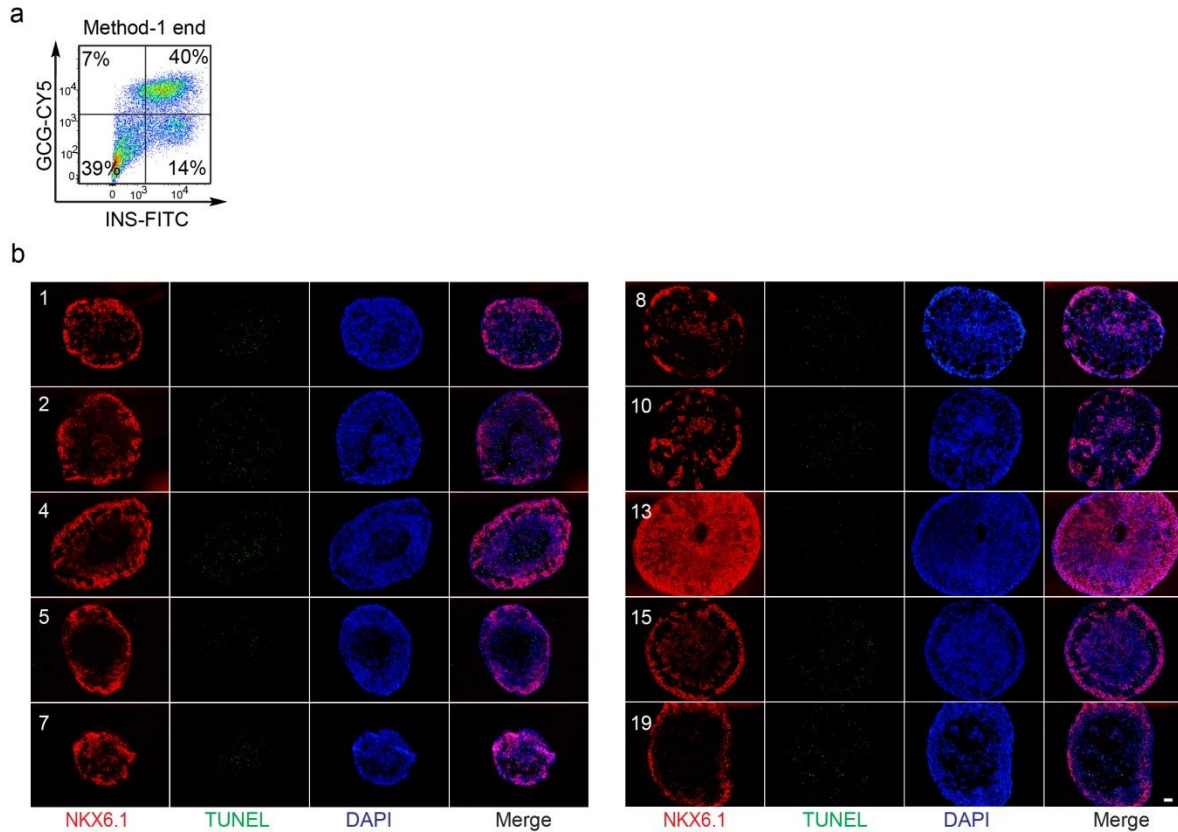

**Supplementary Fig. 2. Additional data on the enhancement of the tendency of  $\beta$  cell derivation from pancreatic progenitor (PP) 3D-clusters, related to Fig.2.** (a) Flow cytometry analysis of end-stage differentiation cells generated by using Method 1 (n=3). (b) TUNEL analysis of PP-3D clusters after treated by different conditions. Nuclear DAPI staining is shown in blue. Scale bar, 50  $\mu$ m. Images of b are representative of 3 independent experiments. Source data are provided as a source data file.

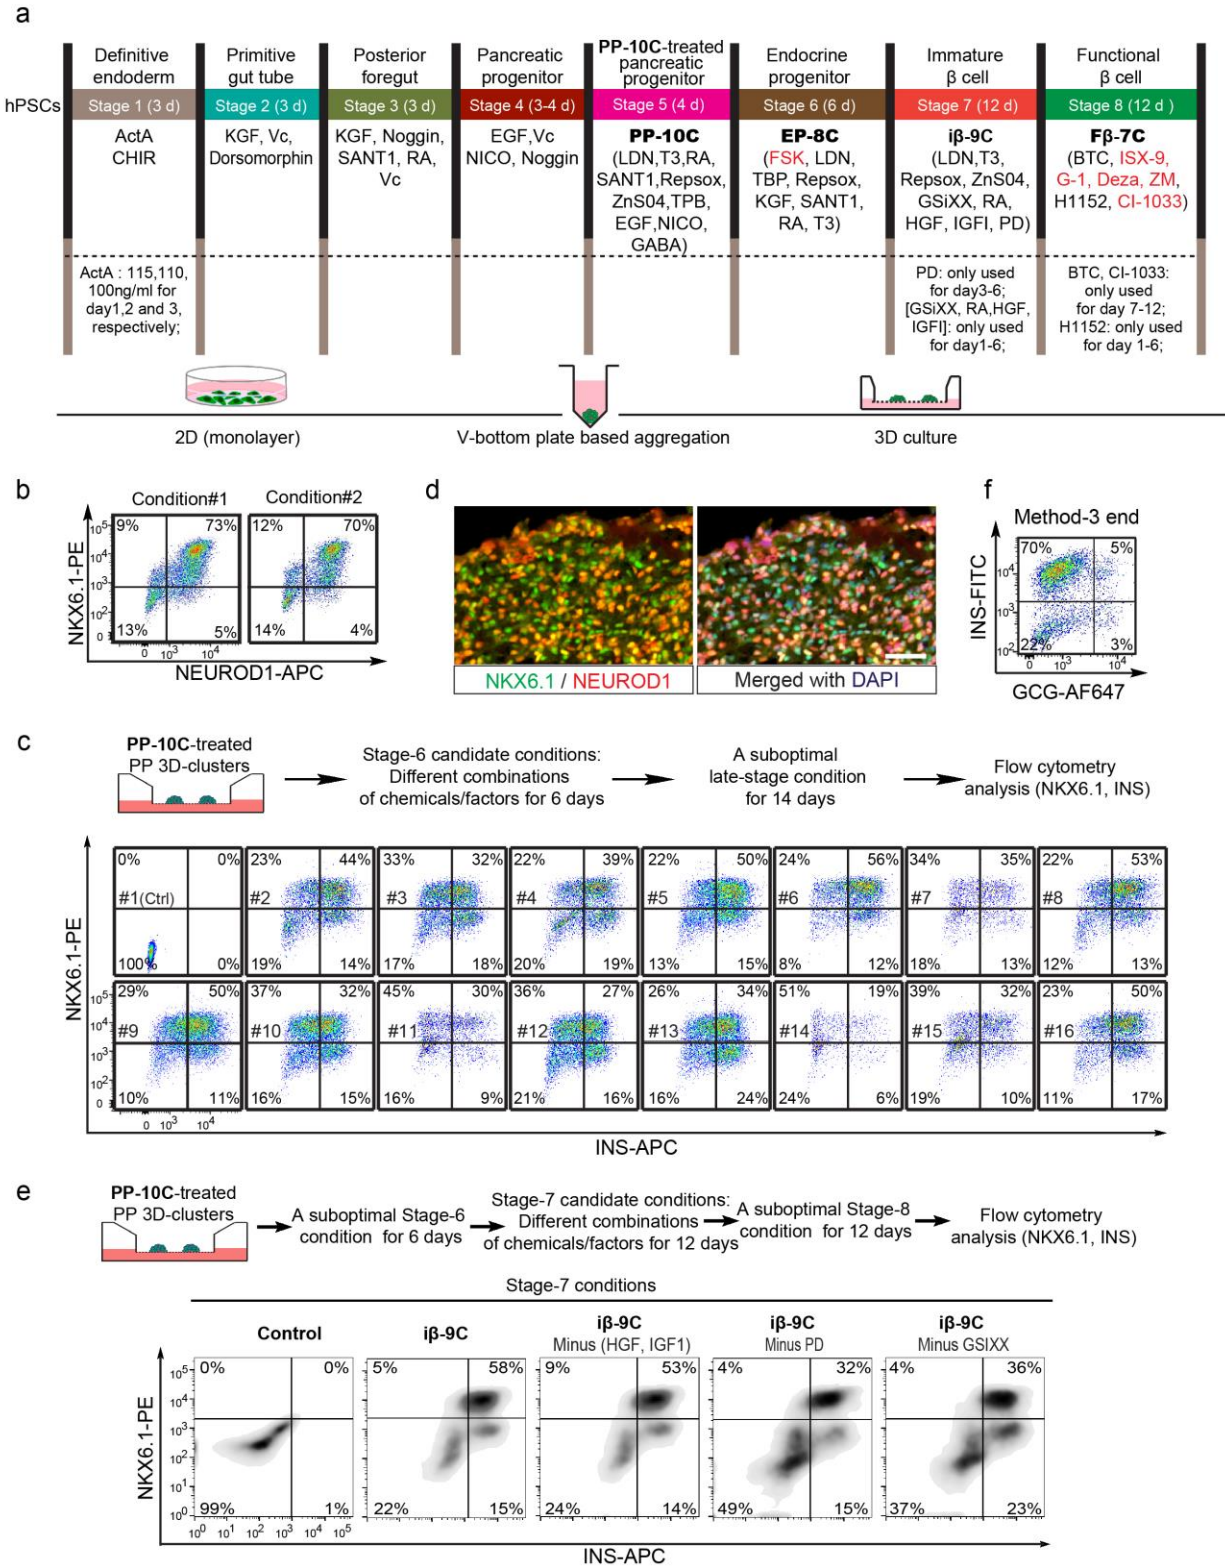

**Supplementary Fig. 3. Additional data on the systematic screening for the differentiation of pancreatic progenitors into  $\beta$  cells, Related to Fig. 3. (a) Schematic graph of the entire protocol**

established in this study. Chemicals/factors highlighted in red have not been reported in literatures for inducing hPSCs into  $\beta$  cells. (b) PP-10C-treated PPs were incubated with Condition #1 (Cocktail-A)), and Condition#2 (Cocktail-A+PP2 (pyrrolo-pyrimidine Src family kinase inhibitor, 5  $\mu$ M)), for 4 days, followed by cell cytometry analysis for the expression of NKX6.1 and NEUROD1. Cocktail-A = ZnSO<sub>4</sub> + Heparin + LDN (0.1  $\mu$ M) + T3 (1  $\mu$ M) + Repsox (10  $\mu$ M, high concentration) + GXISS (100 nM) + SANT1 (0.25  $\mu$ M) + RA (0.05  $\mu$ M) + FSK (10  $\mu$ M). (c) To obtain a better condition for stage 6 (endocrine progenitor stage), PP-10C-treated PP 3D-clusters were treated with different combinations of chemicals/factors for 6 days, followed by a suboptimal later-stage condition treatment for 14 days. Cells were then analyzed for expression of NKX6.1 and INS using cell cytometry, showing that condition #6 (containing 8 chemicals/factors, termed as EP-8C) generated the most NKX6.1/INS<sup>+</sup> cells. (For detailed experimental design, see supplementary method) (n=3). (d) Representative images of NEUROD1 and NKX6.1 immunofluorescence for H1 hES-derived cell cultures at the end of stage 6 after treatment of #6 condition (8 chemicals/factors, EP-8C) at stage 6. (e) Cell cytometry analysis of stage-8 cells showed adding i $\beta$ -9C at stage 7 efficiently induced (NKX6.1+/INS<sup>+</sup>)  $\beta$  cells from earlier stages, while subtracting some factors from i $\beta$ -9C at stage 7 reduced the final efficiency (n=3). (f) Cell cytometry analysis of H1 hES-derived stage-8 cells by using Method 3 (n=3). Nuclear DAPI staining is shown in blue. Scale bar, 100  $\mu$ m. Images of d are representative of 3 independent experiments.

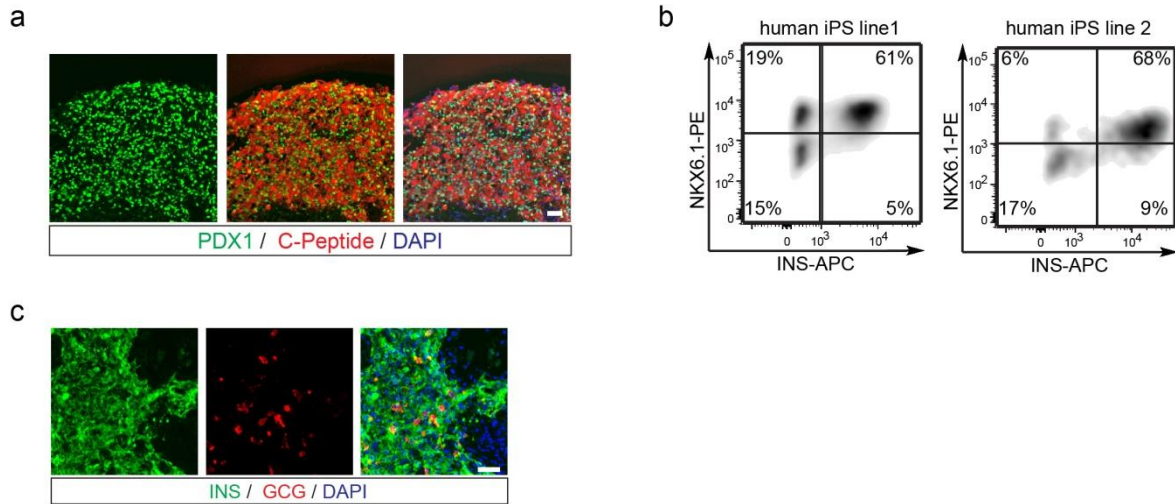

**Supplementary Fig. 4. Additional data on the function of the hESCs-derived  $\beta$  cells, Related to Fig. 3.** (a) Representative images of PDX1 and C-peptide immunofluorescence in stage-8 cells. (b) Cell cytometry analysis of stage-8 cells from two human iPSC lines. The NKX6.1<sup>+</sup>/INS<sup>+</sup> cell population represents  $\beta$  cells. (c) Representative images of GCG and INS immunofluorescence in a 20-week engraftment derived from stage-8 cells (in normal NSG mice). Scale bar, 100  $\mu$ m. Source data are provided as a source data file. Images of a and c are representative of 3 independent experiments, respectively.

**Supplementary Table 1.** Different concentrations of Activin-A used at stage 1 affect the production of NKX6.1+/PDX1+ pancreatic progenitor at the end of stage 4

| Activin-A (ng/ml)<br>day1-day2-day3                       | PDX1+<br>cells | NKX6.1+<br>cells | PDX1+/NKX6.+<br>cells |
|-----------------------------------------------------------|----------------|------------------|-----------------------|
| Constant low-dose of Activin-A<br>(100-100-100)           | ~50% -80%      | ~15% -50%        | ~15% -50%             |
| Decreasing gradient dose of<br>Activin-A<br>(115-110-100) | ~93%           | ~80%             | ~80%                  |
| Constant high-dose of Activin-A<br>(115-115-115)          | ~90%           | ~20% -50%        | ~20% -50%             |

**Supplementary Table 2.** A custom library of growth factors and compounds modulating most of the known development and differentiation-related signaling pathways.

| Signaling pathway/target  | Function (inhibitor/Activator) | Chemical/factor name (concentration tested)    |
|---------------------------|--------------------------------|------------------------------------------------|
| WNT                       | Inhibitor                      | XAV939 (0.1-5 $\mu$ M)                         |
| WNT                       | Inhibitor                      | wnt-c59 (0.01, 2 $\mu$ M)                      |
| WNT                       | Activator                      | wnt3a (2,20 ng/ml)                             |
| WNT                       | Inhibitor                      | IWR1-1-endo (2.5 $\mu$ M)                      |
| WNT                       | Inhibitor                      | IWP2 (0.1-2 $\mu$ M)                           |
| WNT                       | Activator                      | CHIR99021 (1,3 $\mu$ M)                        |
| Vitamin                   | Others                         | VC (0.25 mM)                                   |
| Vitamin                   | Others                         | Nicotinamide (10 mM)                           |
| VEGF                      | Activator                      | VEGF (50 ng/ml)                                |
| TGFBeta                   | Activator                      | TGFBeta3 (1-5 ng/ul)                           |
| TGFBeta                   | Activator                      | TGFBeta1 (1-5 ng/ul)                           |
| TGFBeta                   | Inhibitor                      | SB431542 (2 $\mu$ M)                           |
| TGFBeta                   | Inhibitor                      | Repsox (1, 2,10 $\mu$ M)                       |
| TGFBeta                   | Activator                      | human ActinA (2,10,50 ng/ml)                   |
| TGFBeta                   | Inhibitor                      | A83-01 (0.5 $\mu$ M)                           |
| TGF (BMP), AMPK           | Inhibitor                      | Dorsomorphin (0.75 $\mu$ M)                    |
| TGF (BMP)                 | Inhibitor                      | Noggin (200 ng/ml)                             |
| TGF (BMP)                 | Inhibitor                      | LDN193189 (0.1 $\mu$ M)                        |
| TGF (BMP)                 | Activator                      | human BMP4 (20 ng/ml)                          |
| Ribosomal S6 kinase (RSK) | Inhibitor                      | BRD7389                                        |
| RHO/ROCK                  | Inhibitor                      | Y27632 (10 $\mu$ M)                            |
| RHO/ROCK                  | Inhibitor                      | H1152 (5 $\mu$ M)                              |
| RHO/ROCK                  | Inhibitor                      | Fasudil (3 $\mu$ M)                            |
| RA (retinoic acid)        | Activator                      | RA (0.01, 1 $\mu$ M)                           |
| RA (retinoic acid)        | Inhibitor                      | LE135 (1 $\mu$ M)                              |
| RA (retinoic acid)        | Inhibitor                      | BMS195614 (1-2 $\mu$ M)                        |
| RA (retinoic acid)        | Activator                      | AM580 (0.05 $\mu$ M)                           |
| RA (retinoic acid)        | Inhibitor                      | AGN193109 (1 $\mu$ M)                          |
| Pluripotency related      | others                         | Minocycline hydrochloride (MiH) (2 $\mu$ M)    |
| Pluripotency related      | others                         | (S)-(+)-dimethindene maleate (DiM) (2 $\mu$ M) |
| PLK4                      | Inhibitor                      | Centrinone B (30 nM)                           |
| PKC                       | Activator                      | TPB (0.2 $\mu$ M)                              |
| PI3K                      | Inhibitor                      | Ly294002 (2,20 $\mu$ M)                        |
| PI3K                      | Activator                      | Human LIF (10 ng/ml)                           |
| PI3K                      | Activator                      | Human IGF2 (50 ng/ml)                          |
| PI3K                      | Activator                      | Human IGF1 (50 ng/ml)                          |



|                             |                 |                                       |
|-----------------------------|-----------------|---------------------------------------|
| PI3K                        | Activator       | hIGF-II (50 ng/ml)                    |
| PDGF                        | Inhibitor       | SU16F (2 $\mu$ M)                     |
| PDGF                        | Inhibitor       | JNJ10198409 (0.1 $\mu$ M)             |
| PDGF                        | Activator       | human PDGFAB (20 ng/ml)               |
| P70                         | Inhibitor       | LY2584702 (2 $\mu$ M)                 |
| P38,Pluripotency related    | Inhibitor       | SB202190 (10-20 $\mu$ M)              |
| P38, MAPK                   | Inhibitor       | SB203580 (20 $\mu$ M)                 |
| Others                      | Others          | Zinc sulfate heptahydrate             |
| Others                      | Others          | Heparin (10 ug/ml)                    |
| Others                      | Others          | GABA (1 mM)                           |
| Others                      | Others          | dexamethasone                         |
| NOTCH-SRC                   | Inhibitor       | PP2 (5 $\mu$ M)                       |
| NOTCH                       | Activator       | JAG-1 (100 ng/ml)                     |
| NOTCH                       | Inhibitor       | GSiXX (0.1 $\mu$ M)                   |
| Notch                       | others          | DLI4 (250 ng/ml)                      |
| Notch                       | others          | DLI1 (250 ng/ml)                      |
| Notch                       | Inhibitor       | DAPT (1 $\mu$ M)                      |
| mTOR                        | Inhibitor       | rapamycin (5 nM)                      |
| Monoamine oxidase           | Inhibitor       | Tranylcypromine (Parnate) (5 $\mu$ M) |
| MEK                         | Inhibitor       | PD0325901 (1 $\mu$ M)                 |
| Lysophosphatidic acid (LPA) | Activator       | LPA (1-2 $\mu$ M)                     |
| JNK, Protein synthesis      | others          | Anisomycin (5 $\mu$ M)                |
| JNK                         | Inhibitor       | SP600125 (10-20 $\mu$ M)              |
| Hypoxia                     | others          | CoCl <sub>2</sub> (100-200 $\mu$ M)   |
| Hormone                     | Activator       | T3 (0.1, 1 $\mu$ M)                   |
| HGF                         | Activator       | HGF ( 50 ng/ml)                       |
| Hedgehog/Smoothened         | Inhibitor       | sant1 (0.25 $\mu$ M)                  |
| Hedgehog/Smoothened         | Activator       | Hh-Ag1.5 (0.2 $\mu$ M)                |
| Hedgehog/Smoothened         | Inhibitor       | GDC0449 (0.1-2 $\mu$ M)               |
| GPER                        | Activator       | G-1 (1 $\mu$ M)                       |
| GLP1                        | Activator       | Exendin-4 (50 ng/ml)                  |
| Gene activator              | NeuroD1 inducer | ISX-9 (10 $\mu$ M)                    |
| Gene activator              | PDX1 inducer    | BRD7552 (5 $\mu$ M)                   |
| GDNF                        | Activator       | hGDNF (50 ng/ml)                      |
| G9a/GLP                     | Inhibitor       | BIX-01294 (1 $\mu$ M)                 |
| FGF                         | Inhibitor       | SU5402 (2 $\mu$ M)                    |
| FGF                         | Inhibitor       | PD173074 (0.1 $\mu$ M)                |
| FGF                         | Activator       | human bFGF (1,5,20 ng/ml)             |
| FGF                         | Activator       | hFgf9 (20 ng/ml)                      |
| FGF                         | Activator       | hFGF4 (50 ng/ml)                      |
| FGF                         | Activator       | hFGF10 (50 ng/ml)                     |
| FGF                         | Activator       | hFGF1 (50 ng/ml)                      |

|                       |           |                                |
|-----------------------|-----------|--------------------------------|
| FGF                   | Activator | FGF7 (KGF, 5-20 ng/ml)         |
| ER-beta               | Activator | WAY-200070 (0.1, 1µM)          |
| ER-beta               | Activator | AC-186 (0.5µM)                 |
| ER-alpha              | Activator | PPT (0.1µM)                    |
| ER-alpha              | Inhibitor | MPP dihydrochloride (2µM)      |
| Epigenetics           | Inhibitor | VPA (0.5 mM)                   |
| Epigenetics           | Inhibitor | TSA(0.02µM)                    |
| Epigenetics           | Inhibitor | RG108 (0.1-10µM)               |
| Epigenetics           | Inhibitor | NaB (0.2 mM)                   |
| Epigenetics           | Inhibitor | DEZA; Deazaneplanocin A (1 µM) |
| Epigenetics           | others    | 5-Azacytidine (AZT, 5µ M)      |
| EGFR and ErbB2        | Inhibitor | CI-1033 (1 µM)                 |
| EGF related           | Activator | Betacellulin (20 ng/ml)        |
| EGF                   | Activator | hEGF (10,50,100 ng/ml)         |
| EGF                   | Inhibitor | Erlotinib (10 µM)              |
| DOT1L                 | Inhibitor | SGC 0946 (2. 5µM)              |
| DOT1L                 | Inhibitor | EPZ004777 (5 µM )              |
| cAMP, PKA             | Activator | 8-Br-cAMP (0.1-0.3 mM)         |
| cAMP                  | Activator | Forskolin (10 µM)              |
| cAMP                  | Activator | dbcAMP (0.1-1 mM)              |
| Calcium signaling     | others    | LONO (1 µM)                    |
| Calcium signaling     | Activator | BayK8644 (2 µM)                |
| AXL,RSK               | Inhibitor | R428 (2 µM)                    |
| Autophagy             | others    | SMER28 (50 µM)                 |
| Aurora kinase         | Inhibitor | ZM447439 (ZM, 0.5, 2.5 µM)     |
| Aurora kinase         | Inhibitor | AMG-900 (1 µM)                 |
| ATPase                | Inhibitor | Blebbistatin (1-10 µM)         |
| Anti-diabetes related | others    | Pioglitazone HCl (10 µM)       |

**Supplementary Table 3.** Generation of  $\beta$  cells from multiple hPSC lines in different tests.

| Cell line          | Efficiency of $\beta$ cell generations in different tests |
|--------------------|-----------------------------------------------------------|
| H1 hESC            | 78%; 82%; 67%; 75%; 74%                                   |
| H1 hESC-NKX6.1-GFP | 75%; 64%; 77%                                             |
| hiPSC1             | 61%; 57%                                                  |
| hiPSC2             | 68%; 60%; 63%                                             |
| hiPSC3             | 63%                                                       |

**Supplementary Method.** Other supplementary information.

1. Related to Figure 1J: Experimental design for Figure 1J: To identify the optimal condition for the stage 5, the cells from the stage 4 were dissociated and aggregated (day1) and cultured (day2,3,4) on air-liquid surface using the 21 different conditions as listed in this table. The clusters were then fixed and sectioned for staining. Note: all the factors listed were used for the entire 4 days unless specifically indicated.

| Conditions= V4b-medium+RA(0.05 $\mu$ M)+SANT1(0.25 $\mu$ M)+LND(0.1 $\mu$ M)+T3(1 $\mu$ M)+ZnSon4+heparin(10mg/ml)+TPB(0.1 $\mu$ M)+Y27632(used for only day 1(aggregation day))+ factors listed in give condition |           |                |              |                |                                       |
|--------------------------------------------------------------------------------------------------------------------------------------------------------------------------------------------------------------------|-----------|----------------|--------------|----------------|---------------------------------------|
| 1                                                                                                                                                                                                                  | GABA(1mM) |                |              |                |                                       |
| 2                                                                                                                                                                                                                  | GABA(1mM) | EGF(50ng/ml)   | KGF(20ng/ml) |                |                                       |
| 3                                                                                                                                                                                                                  |           |                |              |                |                                       |
| 4                                                                                                                                                                                                                  | GABA(1mM) | EGF(10 ng/ml)  | KGF(20ng/ml) |                | repsox(10 $\mu$ M), only for day2,3,4 |
| 5                                                                                                                                                                                                                  | GABA(1mM) |                | KGF(20ng/ml) |                | repsox(10 $\mu$ M), only for day2,3,4 |
| 6                                                                                                                                                                                                                  | GABA(1mM) |                |              |                | repsox(10 $\mu$ M), only for day2,3,4 |
| 7                                                                                                                                                                                                                  |           | EGF(100 ng/ml) | NiCO(10mM)   | DBZ(1 $\mu$ M) | repsox(10 $\mu$ M), only for day2,3,4 |
| 8                                                                                                                                                                                                                  | GABA(1mM) | EGF(100 ng/ml) | NiCO(10mM)   | DBZ(1 $\mu$ M) | repsox(10 $\mu$ M), only for day2,3,4 |
| 9                                                                                                                                                                                                                  | GABA(1mM) |                |              |                | repsox(10 $\mu$ M), only for day2,3,4 |
| 10                                                                                                                                                                                                                 |           |                |              |                | repsox(10 $\mu$ M), only for day2,3,4 |
| 11                                                                                                                                                                                                                 | GABA(1mM) |                | KGF(5ng/ml)  |                | repsox(10 $\mu$ M), only for day2,3,4 |
| 12                                                                                                                                                                                                                 |           |                |              |                | repsox(10 $\mu$ M), only for day2,3,4 |
| 13                                                                                                                                                                                                                 | GABA(1mM) | EGF(100 ng/ml) | NiCO(10mM)   |                | repsox(10 $\mu$ M), only for day2,3,4 |
| 14                                                                                                                                                                                                                 |           | EGF(10 ng/ml)  |              |                | repsox(10 $\mu$ M), only for day2,3,4 |
| 15                                                                                                                                                                                                                 | GABA(1mM) | EGF(10 ng/ml)  |              |                | repsox(10 $\mu$ M), only for day2,3,4 |
| 16                                                                                                                                                                                                                 | GABA(1mM) | EGF(10 ng/ml)  |              | DBZ(1 $\mu$ M) | repsox(10 $\mu$ M), only for day2,3,4 |
| 17                                                                                                                                                                                                                 | GABA(1mM) | EGF(10 ng/ml)  |              | DBZ(1 $\mu$ M) | repsox(10 $\mu$ M), only for day2,3,4 |
| 18                                                                                                                                                                                                                 | GABA(1mM) | EGF(20 ng/ml)  | NiCO(10mM)   | DBZ(1 $\mu$ M) | repsox(10 $\mu$ M), only for day2,3,4 |
| 19                                                                                                                                                                                                                 | GABA(1mM) | EGF(50 ng/ml)  | KGF(20ng/ml) |                |                                       |
| 20                                                                                                                                                                                                                 |           | EGF(10 ng/ml)  |              | DBZ(1 $\mu$ M) | repsox(10 $\mu$ M), only for day2,3,4 |
| 21                                                                                                                                                                                                                 |           | EGF(10 ng/ml)  |              |                | repsox(10 $\mu$ M), only for day2,3,4 |

2. Related to Figure S2C: Experimental design for Figure S2C: To identify the optimal condition for the stage 6, the stage 5 clusters were treated with S6-Basic-condition supplemented with the extra factors as listed for 6 days, followed by treated with later stage medium (made of 4#-medium, supplemented with (gamma secretase inhibitor XX (GXISS, 100nM, only for day1-6)+RA(0.05  $\mu$ M, only for day1-6)+HGF(50ng/ml, only for day1-6)+IGF1(50 ng/ml, only for day1-6) +FGF inhibitor PD173074 (0.1  $\mu$ M, only for day3-6) +BTC(10 ng/ml). 4#-medium=V4b-medium+ ZnSO4(10mM)+ Heparin(10mg/ml) + LDN(100 nM)+T3(1  $\mu$ M)+Repsox(10  $\mu$ M) ). In the end the clusters were dissociated into single cells for cell cytometry analysis for the expression of INS and NKX6.1.

| <b>S6-Basic-condition=DMEM+B27+LDN(0.5 <math>\mu</math>M) +TBP(30 nM) + KGF( 25 ng/ml)</b> |                     |                  |                 |               |                 |                    |
|--------------------------------------------------------------------------------------------|---------------------|------------------|-----------------|---------------|-----------------|--------------------|
| ID                                                                                         |                     |                  |                 |               |                 |                    |
| #2                                                                                         | SANT1(0.25 $\mu$ M) | RA(0.05 $\mu$ M) | FSK(10 $\mu$ M) |               | Rep(1 $\mu$ M)  |                    |
| #3                                                                                         | SANT1(0.25 $\mu$ M) | RA(0.05 $\mu$ M) |                 | T3(1 $\mu$ M) |                 |                    |
| #4                                                                                         | SANT1(0.25 $\mu$ M) | RA(0.05 $\mu$ M) | FSK(10 $\mu$ M) | T3(1 $\mu$ M) | Rep(1 $\mu$ M)  | BTC(10ng/ml)       |
| #5                                                                                         | SANT1(0.25 $\mu$ M) | RA(0.05 $\mu$ M) | FSK(30 $\mu$ M) | T3(1 $\mu$ M) |                 |                    |
| #6                                                                                         | SANT1(0.25 $\mu$ M) | RA(0.05 $\mu$ M) | FSK(10 $\mu$ M) | T3(1 $\mu$ M) | Rep(1 $\mu$ M)  |                    |
| #7                                                                                         | SANT1(0.25 $\mu$ M) |                  | FSK(10 $\mu$ M) | T3(1 $\mu$ M) | Rep(1 $\mu$ M)  |                    |
| #8                                                                                         | SANT1(0.25 $\mu$ M) | RA(0.05 $\mu$ M) | FSK(20 $\mu$ M) | T3(1 $\mu$ M) |                 |                    |
| #9                                                                                         | SANT1(0.25 $\mu$ M) | RA(0.05 $\mu$ M) | FSK(10 $\mu$ M) | T3(1 $\mu$ M) | Rep(1 $\mu$ M)  | extra KGF(25ng/ml) |
| #10                                                                                        | SANT1(0.25 $\mu$ M) | RA(0.05 $\mu$ M) | FSK(10 $\mu$ M) | T3(1 $\mu$ M) | Rep(1 $\mu$ M)  | EGF(10ng/ml)       |
| #11                                                                                        |                     | RA(0.05 $\mu$ M) | FSK(10 $\mu$ M) | T3(1 $\mu$ M) | Rep(1 $\mu$ M)  |                    |
| #12                                                                                        | SANT1(0.25 $\mu$ M) | RA(0.05 $\mu$ M) | FSK(10 $\mu$ M) | T3(1 $\mu$ M) | Rep(1 $\mu$ M)  | EGF(50ng/ml)       |
| #13                                                                                        | SANT1(0.25 $\mu$ M) | RA(0.05 $\mu$ M) | FSK(10 $\mu$ M) | T3(1 $\mu$ M) | Rep(20 $\mu$ M) |                    |
| #14                                                                                        | SANT1(0.25 $\mu$ M) |                  |                 | T3(1 $\mu$ M) | Rep(1 $\mu$ M)  |                    |
| #15                                                                                        | SANT1(0.25 $\mu$ M) |                  | FSK(10 $\mu$ M) | T3(1 $\mu$ M) |                 |                    |
| #16                                                                                        | SANT1(0.25 $\mu$ M) | RA(0.05 $\mu$ M) | FSK(10 $\mu$ M) | T3(1 $\mu$ M) | Rep(10 $\mu$ M) |                    |

3. An example of cell cytometry gating strategy. The preliminary gates of the starting population: The cell population was plotted by FSC-A/FSC-W and SSC-A/SSC-W, and gates were drawn to remove cell with high SSC-W or FSC-W value (these are doublets or aggregates) (See figure below). Typically the resulting cell group was the major single cell population with most fragmented or clustered cells being excluded. To define the boundary between positive and negative, we performed staining on cells negative for the target protein or using antibody controls (either secondary antibody only or isotopes of primary antibody). In the example below, the upper panel showed the gating of undifferentiated hESCs, which was used as a negative cell control for staining of PDX1-APC and NKX6.1-PE. And the lower panel showed the sample example (hiPSC line 1-derived stage-4 cells) stained with PDX1-APC and NKX6.1-PE antibodies.

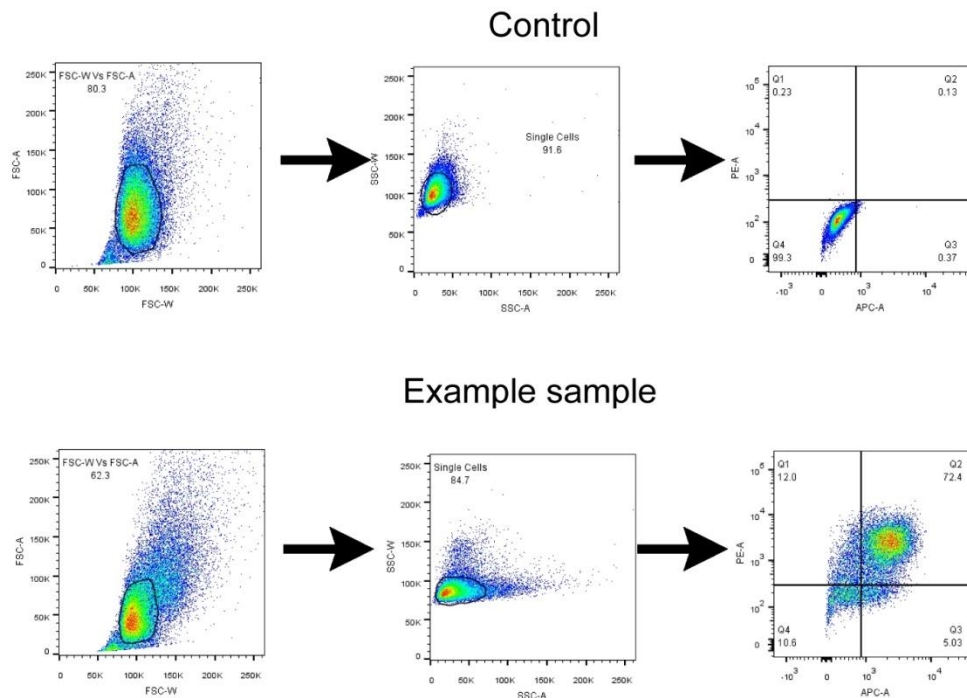

4. Related to Supplementary Figure 1E. Determine the gradient condition of Activin-A at stage 1. At the beginning, we tested Activin-A at 100 ng/ml for 3 days on hPSCs with cell density around 70-80% confluence (a confluence used in several published studies) and found that it could efficiently induce hPSCs into definitive endoderm (>90%, based on the expression of markers FOXA2 and SOX17). However, with such a cell density, we found that it could not generate high percentage of pancreatic progenitors at stage 4. Through further analysis, we discovered that NKX6.1 expression at stage 4 mainly showed up in areas with high cell density. In addition, the lower overall density of the cell culture at stage 1, the less NKX6.1 expression was induced at stage 4 (despite the PDX1 expression was not greatly affected). Therefore, we increased the starting hES cell density to about 90% confluence. However, in such a high cell density we frequently observed a certain amount of undifferentiated hPSCs (~10%-25%) at the end of stage 1, when 100 ng/ml Activin-A was applied constantly for three days at stage 1. Thus, to identify the optimal condition of Activin-A, we examined different concentrations of Activin-A for stage 1, including 80, 90, 95, 100, 105, 110, 115, 120, 125, 130 and 140 ng/ml, and finally the condition of 115 ng/ml worked as the best for the day1 in our hand. Therefore, we decided to use gradient Activin A in our final protocol, which were 115ng/ml (day1), 110ng/ml (day2) and 100ng/ml (day3) as described in Supplementary Fig.1E that either constant high or low dose of Activin-A negatively impacted the NKX6.1 expression. In sum, one possible reason for the use of slightly higher Activin A than most published protocols is that higher starting hPSCs cell density can generate higher NKX6.1 expression at Stage 4, but also requires a higher dose of Activin-A to initiate the differentiation.
